# Supplementary material for: CPSF6 Defines a Conserved Capsid Interface that Modulates HIV-1 Replication
Source: PLoS Pathog. 2012 Aug 30;8(8):e1002896. doi: 10.1371/journal.ppat.1002896 (PMC3431306; doi:10.1371/journal.ppat.1002896)
Supplement: Table S1 — Crystallographic data collection and refinement statistics. (PDF) [file ppat.1002896.s003.pdf]

**Table S1**Data collection and refinement statistics for HIV-1 CA<sup>N</sup>:CPSF6<sub>313-327</sub>**Data collection**

|                                    |                  |
|------------------------------------|------------------|
| Space group                        | $P2_12_12_1$     |
| Cell dimensions                    |                  |
| <i>a</i> , <i>b</i> , <i>c</i> (Å) | 40.6, 46.4, 80.8 |
| <i>a</i> , <i>b</i> , <i>g</i> (°) | 90.0, 90.0, 90.0 |
| Resolution (Å)                     | 36 – 1.8         |
| <i>R</i> <sub>sym</sub>            | 0.044 (0.311)*   |
| <i>I</i> / <i>σI</i>               | 14.5 (3.2)       |
| Completeness (%)                   | 95.8 (91.1)      |
| Redundancy                         | 3.4 (3.2)        |

**Refinement**

|                                                     |           |
|-----------------------------------------------------|-----------|
| Resolution (Å)                                      | 1.8       |
| No. reflections                                     | 12,982    |
| <i>R</i> <sub>work</sub> / <i>R</i> <sub>free</sub> | 0.22/0.27 |
| No. atoms                                           |           |
| Protein                                             | 1,076     |
| Ligand/ion                                          | 110       |
| Water                                               | 94        |
| B-factors                                           |           |
| Protein                                             | 29.9      |
| Ligand/ion                                          | 40.5      |
| Water                                               | 35.0      |
| R.m.s deviations                                    |           |
| Bond lengths (Å)                                    | 0.023     |
| Bond angles (°)                                     | 1.8       |

\*Numbers in parentheses represent the value in the highest resolution shell.
